# Supplementary material for: A synthetic light-inducible photorespiratory bypass enhances photosynthesis to improve rice growth and grain yield
Source: PubMed Central journal article supplement — Plant Commun. 2023 Jun 22;4(6):100641. doi: 10.1016/j.xplc.2023.100641 (PMC10721467; doi:10.1016/j.xplc.2023.100641), 2023-06-22
Supplement: mmc1.pdf [file mmc1.pdf]

**Plant Communications, Volume 4**

**Supplemental information**

**A synthetic light-inducible photorespiratory bypass enhances photosynthesis to improve rice growth and grain yield**

**Huawei Xu, Huihui Wang, Yanwen Zhang, Xiaoyi Yang, Shufang Lv, Dianyun Hou, Changru Mo, Misganaw Wassie, Bo Yu, and Tao Hu**

# **A synthetic light-inducible photorespiratory bypass enhances photosynthesis to improve rice growth and grain yield**

**Huawei Xu<sup>1, \*</sup>, Huihui Wang<sup>1</sup>, Yanwen Zhang<sup>1</sup>, Xiaoyi Yang<sup>1</sup>, Shufang Lv<sup>1</sup>,  
Dianyun Hou<sup>1</sup>, Changru Mo<sup>2</sup>, Misganaw Wassie<sup>2</sup>, Bo Yu<sup>3</sup>, Tao Hu<sup>4, 2, \*</sup>**

<sup>1</sup>College of Agriculture, Henan University of Science and Technology, Luoyang 471000, China

<sup>2</sup>CAS Key Laboratory of Plant Germplasm Enhancement and Specialty Agriculture, Wuhan Botanical Garden, The Innovative Academy of Seed Design, Chinese Academy of Sciences, Wuhan 430074, China

<sup>3</sup>Shanghai Center for Plant Stress Biology, CAS Center for Excellence in Molecular Plant Sciences, Chinese Academy of Sciences, Shanghai 200032, China

<sup>4</sup>State Key Laboratory of Herbage Improvement and Grassland Agro-ecosystems, College of Pastoral Agriculture Science and Technology, Lanzhou University, Lanzhou 730020, China

\*Correspondence: [xhwycn@163.com](mailto:xhwycn@163.com) (HW. X.); [hut@lzu.edu.cn](mailto:hut@lzu.edu.cn) (T. H.)

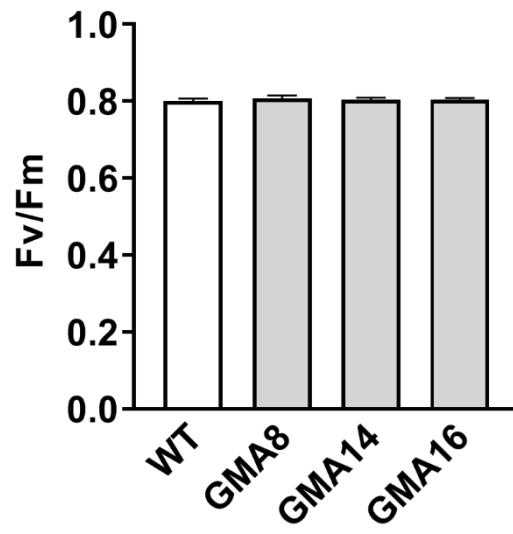

**Supplemental Figure 1** The level of Fv/Fm in GMA and WT plants at the seedling stage in greenhouse

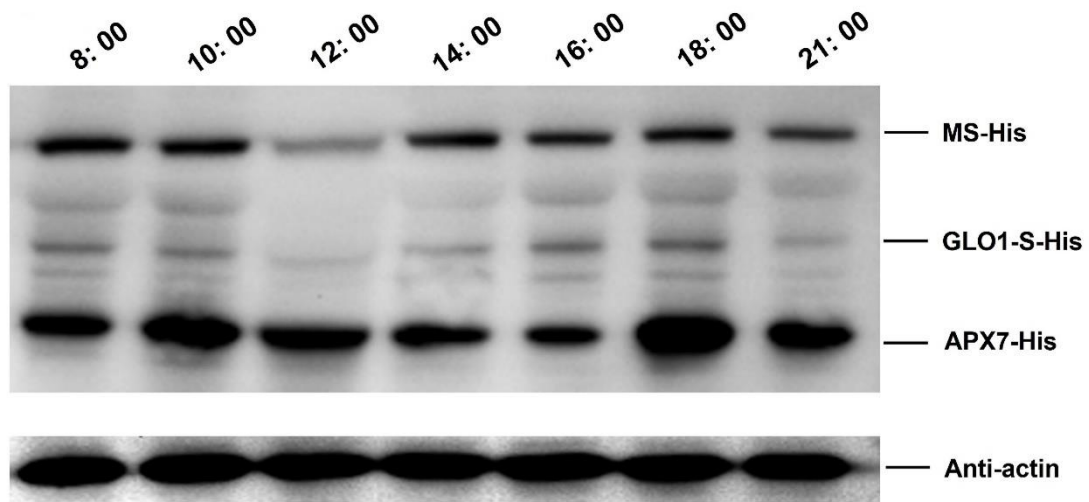

**Supplemental Figure 2** The protein level of GLO1-S during the daytime and nighttime.

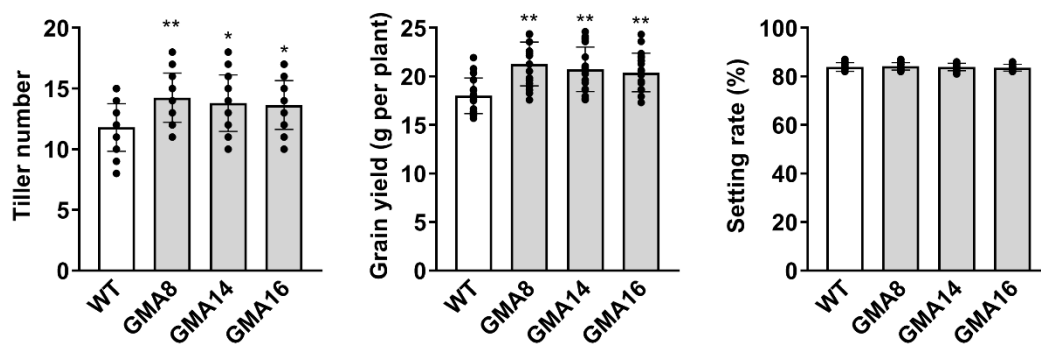

**Supplemental Figure 3** A synthetic light-dependent GMA bypass increases tiller number and grain yield without affecting the seed setting rate in the field of Wuhan.

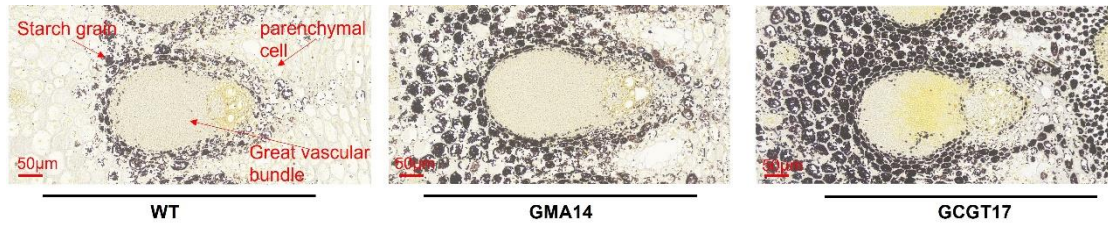

**Supplemental Figure 4** Accumulation of starch around great vascular bundle in stems.

**A** Round I: pYL322d1-GLO1

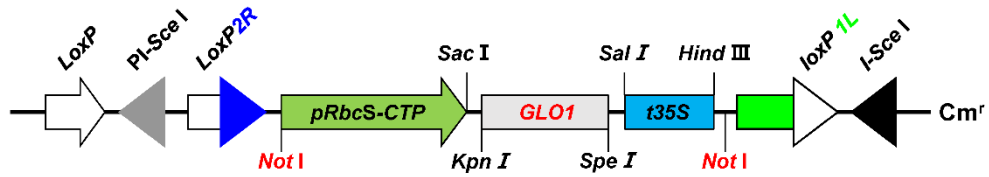

**B** Round II: pYL322d2-MS

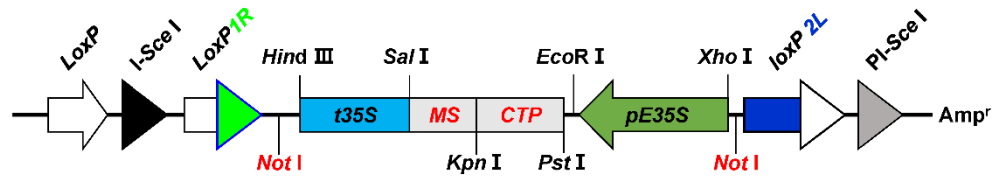

**C** Round III: pYL322d1-APX7

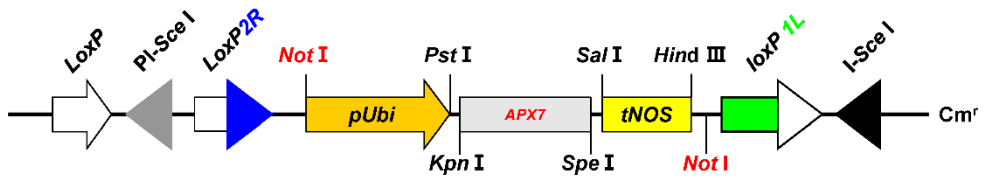

**Supplemental Figure 5** Physical maps of the photorespiratory bypass genes in the donor vectors. (A) *OsGLO1* expression cassette in pYL322d1. (B) *CmMS* expression cassette in pYL322d2. (C) *OsAPX7* expression cassette in pYL322d1.

**Supplemental Table 3** List of primers used in this study.

| Primers name      | Description                                     | Sequence (5'-3')                                                |
|-------------------|-------------------------------------------------|-----------------------------------------------------------------|
| T35s-SalI-F       | Amplification of <i>T35s</i> for pYL322d1-GLO1  | CATAGTCGACGTCGCAAAAATCACCAG                                     |
| T35s-HindIII-R    |                                                 | CCGGAAGCTTGTCACTGGATTTGGTTT                                     |
| PrbcS-R147-NotI-F | Amplification of <i>PrbcS</i> for pYL322d1-GLO1 | TTCTGCGGCCCGCGGGATCGAATTCTGGTGT                                 |
| PrbcS-R147-SacI-R |                                                 | TATAGAGCTCTGCATGCACCTGATCCTGC                                   |
| GLO1-KpnI-F       | Amplification of <i>GLO1</i> for pYL322d1-GLO1  | CGCGGGTACCAATGGGGGAGATCACCAATGTCA                               |
| GLO1-SpeI-R       |                                                 | TGG<br>ACTTACTAGTCTAATGGTGATGGTGATGATGGCG<br>GGCGAGGCGGTTCGGCGT |
| PE35S-XhoI-F      | Amplification of <i>PE35S</i> for pYL322d2-MS   | ACATCTCGAGGTGGAGCACGACACACTT                                    |
| PE35S-EcoRI-R     |                                                 | TGCAGAATTCCTATCGTTCGTAAATGGT                                    |
| T35S-SalI-F       | Amplification of <i>T35S</i> for pYL322d2-MS    | ACTAGTCGACGTCGCAAAAATCACCAG                                     |
| T35S-HindIII-R    |                                                 | CCGCAAGCTTGTCACTGGATTTGGTTT                                     |
| CTP-MS-PstI-F     | Amplification of <i>CTP</i> for pYL322d2-MS     | GATGCTGCAGATGGCCCCCTCCGTGATG                                    |
| CTP-MS-KpnI-R     |                                                 | ATCGGGTACCCATGCACCTGATCCTGCC                                    |
| MS-KpnI-F         | Amplification of <i>MS</i> for pYL322d2-MS      | GTACGGTACCTCGCTGGGAATGTATTCT                                    |
| MS-SalI-R         |                                                 | GGACGTCGACTTAATGGTGATGGTGATGATGCC<br>TGGGATGATGTATGACTA         |
| Tnos-SalI-F       | Amplification of <i>Tnos</i> for pYL322d1-APX7  | GTACGTCGACGTTTCTTAAGATTGAATCCT                                  |
| Tnos-HindIII-R    |                                                 | GCGCAAGCTTCCCGATCTAGTAACATAGAT                                  |
| Pubi-NotI-F       | Amplification of <i>Pubi</i> for pYL322d1-APX7  | TGACGCGGCCGCGAATTCGTGCGCCCCCTCTC                                |
| Pubi-PstI-R       |                                                 | TACGCTGCAGAAGTAACACCAAACAACAGG                                  |
| APX7-KpnI-F       | Amplification of <i>APX7</i> for pYL322d1-APX7  | GTACGGTACCATGGCGGCCAGCGACTCGC                                   |
| APX7-SpeI-R       |                                                 | CTAGACTAGTTTAATGATGATGATGATGATGACC<br>GTCCAACGTGAATCCCT         |
| HPT-F             | PCR detection of gDNA for                       | CTGAACTCACC GCGACGTCTGTC                                        |
| HPT-R             | <i>HPT</i>                                      | TAGCGCGTCTGCTGCTCCATACA                                         |



|            |                                |                         |
|------------|--------------------------------|-------------------------|
| GLO1-F     | PCR detection of gDNA for      | CTTCGGCAACGTCAGCAATG    |
| GLO1-R     | <i>GLO1</i>                    | AGGCGACCTCCTCAACTT      |
| MS-F       | PCR detection of gDNA for      | CTGAATCGGCAGTAAGGAAGAAA |
| MS-R       | <i>MS</i>                      | AGCTCCAGAATTGAGTGCGTTGA |
| APX-F      | PCR detection of gDNA for      | ACCCTGTTGTTTGGTGTACTT   |
| APX-R      | <i>APX7</i>                    | CTCGTTGTGGCCACTCTTTA    |
| GLO1-sq-F  | Semi-quantitative RT-PCR       | TCCAGGGGCTCAAGTC        |
| GLO1-sq-R  | analysis of <i>GLO1</i>        | CCAGAGGCGTAGTAGTCG      |
| MS-sq-F    | Semi-quantitative RT-PCR       | TTCGGCAACGTCAGCAATG     |
| MS-sq-R    | analysis of <i>MS</i>          | GCTCCAGAATTGAGTGCGTTGA  |
| APX7-sq-F  | Semi-quantitative RT-PCR       | TTGATGTGGGTTTTACTGATGC  |
| APX7-sq-R  | analysis of <i>APX7</i>        | GAGGAGCCGAGAAGGTGC      |
| ACT-sq-F   | Internal control for semi-     | CCTCGTCTCGACCTTGCTGGG   |
| ACT-sq-R   | quantitative RT-PCR            | GAGAACAAGCAGGAGGACGGC   |
| GLO1-S-q-F | qPCR analysis of <i>GLO1-S</i> | GCAACGTCAGCAATGG        |
| GLO1-S-q-R |                                | CCAGAGGCGTAGTAGTCG      |
| GLO1-T-q-F | qPCR analysis of <i>GLO1-T</i> | TCGTTCTGCCACCATACTTG    |
| GLO1-T-q-R |                                | GCCACTTCACATCCTTCCAG    |
| SHMT1-q-F  | qPCR analysis of <i>SHMT1</i>  | CAAGCAAGGCAAAGAGGTTATG  |
| SHMT1-q-R  |                                | CAGCTAAGCCAGTAATGGTATGA |
| HPR1-q-F   | qPCR analysis of <i>HPR1</i>   | GCAACACTTGCTGCTCTAAAC   |
| HPR1-q-R   |                                | CTTGAGAAATGGCTCCACTAGAT |
| ACT-q-F    | Internal control for           | TTATGGTTGGGATGGGACA     |
| ACT-q-R    | quantitative RT-PCR            | AGCACGGCTTGAATAGCG      |
